# Supplementary material for: Molecular determinants for dsDNA translocation by the transcription-repair coupling and evolvability factor Mfd
Source: PubMed Central journal article supplement (PMC7385628; doi:10.1038/s41467-020-17457-1), 2020-07-27
Supplement: 41467_2020_17457_MOESM2_ESM.pdf [file 41467_2020_17457_MOESM2_ESM.pdf]

## **Description of Additional Supplementary Files**

File Name: Supplementary Movie 1

Description: Conformational differences between nucleotide-free Mfd and DNA-bound Mfd
